# Supplementary material for: Aflatoxigenic Aspergillus Modulates Aflatoxin-B1 Levels through an Antioxidative Mechanism
Source: MDPI journal article supplement (doi:10.3390/jof9060690), 2023-06-20
Supplement: s1 [file s1]

**Supplemental Table S1.** Percentage (%) aflatoxin producing ability of isolates

| Isolate             | Clade                    | Toxigenicity | G2         | G1          | B2         | B1          |
|---------------------|--------------------------|--------------|------------|-------------|------------|-------------|
| EKW40A <sup>†</sup> | <i>parasiticus</i>       | High         | 0.3        | 28.2        | 0.0        | 71.5        |
| EKW36B              | <i>parasiticus</i>       | High         | 2.1        | 64.3        | 0.9        | 32.7        |
| MKA01K <sup>†</sup> | <i>flavus</i>            | High         | 0.6        | 19.6        | 0.0        | 79.9        |
| ELG33C <sup>†</sup> | <i>parasiticus</i>       | High         | 2.1        | 0.1         | 12.9       | 84.9        |
|                     |                          | <b>Mean</b>  | <b>1.3</b> | <b>28.0</b> | <b>3.5</b> | <b>67.2</b> |
| EKZ10A              | <i>parasiticus</i>       | Low          | 2.2        | 72.2        | 0.0        | 25.7        |
| MKZ06B <sup>†</sup> | <i>minisclerotigenes</i> | Low          | 0.0        | 0.0         | 0.0        | 100.0       |
| ELV13C              | <i>parasiticus</i>       | Low          | 0.0        | 71.3        | 0.0        | 28.7        |
|                     |                          | <b>Mean</b>  | <b>0.7</b> | <b>47.8</b> | <b>0.0</b> | <b>51.4</b> |

<sup>†</sup> Depicts isolates that produced more B1 than G1. A significant proportion of total aflatoxin is B1 with 4 out of the 7 isolates producing B1 > 50%.
